# Supplementary material for: The response of geophytes to continuous human foraging on the Cape south coast, South Africa and its implications for early hunter-gatherer mobility patterns
Source: PeerJ. 2022 May 3;10:e13066. doi: 10.7717/peerj.13066 (PMC9074880; doi:10.7717/peerj.13066)
Supplement: Supplemental Information 1 [file peerj-10-13066-s001.xlsx]

## Sheet: MetaData
Metadata
			General length
Title of data set:	Depletion plots		Short
Data set Owner\s:	Susan Botha		Short
Organisation:	Nelson Mandela University		Short
Student details
Contact person	Susan Botha		Short
Position	Graduate		Short
Phone	082 601 3559		Short
Email	susan.botha@gmail.com		Short
Homepage	n/a		Short
Address	The Plains Cottage, Vlakteplaas, Jeffreys Bay, South Africa		Short
Supervisor details
Contact person	Alastair Potts		Short
Position	Resarcher		Short
Phone	824917275		Short
Email	potts.a@gmail.com		Short
Homepage	https://www.pottsresearch.org.za/		Short
Address	Office: Room 0114, Building 12, South Campus, Port Elizabeth		Short
Spatial Coverage	Use Google Earth, if necessary.
Bounding coordinates: N	S34˚		Short
Bounding Coordinates: S	S34˚30'		Short
Bounding coordinates: W	21˚10'		Short
Bounding coordinates: E	22˚10'		Short
Description	Located between the archaeological sites of Blombos Cave in the west and Pinnacle Point in the east and extends inland to the foothills of the Langeberg-Outeniqua mountains.		Short
Temporal Coverage
Start Date	2015-08-01		Short
End Date	2017-09-01		Short
General Description	We harvested edible geophytes once a year for three years over the Spring months (Aug to Oct)		Short
Ethics clearance
Is ethics clearnance required? (If No, why not?)	Yes		Short
Ethics committee:	NMU Research Ethics Committee		Short
Ethics permit No:	H15-SCI-BOT-001		Short
Rights
Co-authorship required?	yes		Short
Acknowledgement required?	yes		Short
Commercial use acceptable?	yes		Short
Citation			Short
IP Rights			Short
Short background	The study was conducted to determine the resilience of USOs to repeated human foraging		Medium
Aims, Objectives and/or Hypotheses	The aim was to determine how long humans can survive in a given site within the cape South Coast and rely on the USOs around that site as a source of food. The objective was to determine how resilient USOs are to repeated foraging. The hypotheses was that USO would be easily depleted by human foraging since the whole plant is generally removed during foraging.		Medium
Methods	Be as detailed as possible. Provide references if needed
Experimental design	We set up 19 10m by 10m plots with permanent pens marking each corner. We cordoned the plot off with ropes, spanning from corner to corner and with the help of human foragers dug out all the available edible USOs until the plot was depleted. We then returned to the plot for another two years, over the spring season, and again harvested the plot of all edible USOs.		Long
Methods used to generate the data set (link these to columns in the Description and Units section below)	The time the foragers took to harvest each plot was recorded (time started, time ended). Once the foragers had depleted the site, we weighed and counted the number of plants per species. After we recorded the gross weight, we cleaned the USOs of all inedible material e.g. corm sheaths and recorded the time it took to clean the USOs. (Columns: Species, Common name, part collected, gross weight, ed…		Long
Equipment used	The foragers used wooden sticks to dig out geophytes. These sticks were generally found on site and were approximately 20 to 30 cm long. To delineate the plot we marked each corner with a steel pen which we left in the ground for the duration of the experiment (3 years). Each year we would mark the plot out using rope so that it is clearly visible to the foragers where the borders of the plot is.
Sampling Description - how were the samples collected	The samples were collected by human foragers who used sticks to dig up USOs from 19 plots. They dug up all USOs that are visible within a plot in 2015 and then returned for another two consecutive years in spring to the same plots to dig up visible USOs again.		Medium
Quality Control (was any form of data verification / cleaning? If so briefly describe methods)			Medium
Sensitive data
Are there any records in the data set that represent sensitive data (e.g. populations threatened if the exact locality is made public)? Please explain which ones and the rationale for considering these as sensitive data. If included, please flag sensitive species records in the data sheet, and describe here how the records can be identified.	We do not include the exact GPS co-ordinates for any of the plots. We also do not reveal the identity of any of the foragers that participated in the experiment.		Short to medium
Spreadsheet and Column names	Description and units
Spreadsheet: 1.InPlot_Harvested	General description of what this spreadsheet contains and an explanation of the name if necessary.
Column: Order	Order in which the data was entered. 1 = the first data entry
Column: PlotNo	The unique number assigned to each unique plot
Column: Date	The date when the plot was harvested
Column: Year	The year in which the plot was harvested
Column: Forager ID	The ID no assigned to each unique forager
Column: StartTime	The time recorded when foraging (extracting geophytes) started for each plot
Column: StopTime	The time recorded when foraging (extracting geophytes) ended for each plot
Column: Duration_min	The number of minutes it took to extract all the geophytes from each plot
Column: Species	The scientific name of the geophyte that was harvested
Column: CommonName	The common name known by the foragers of the geophyte species that was harvested
Column: PartCollected	The part of the geophyte that was extracted by the foragers
Column: GrossWt_lb	The gross weight (lb) of the plant that was harvested before removing non-edible parts
Column: GrossWt_n	The number of plants that were harvested before cleaning the plants, which rarely, you may then find, some plants are old/damaged so they are not edible
Column: GrossWt_kg	The gross weight (kg) of the plant that was harvested before removing non-edible parts
EdibleWt_g	The edible weight of the plants that were harvested, minus the parts that were cleaned off that are inedible
EdibleWt_n	The number of plants that were harvested that can be eaten
ProcessingTime_min	The time it took to clean the plants to extract the edible portion
Spreadsheet:2. InPlot_NotHarvested
PlotNo	The unique number assigned to each unique plot
Location	The descriptive name for the plot based on its location
Date	The date when the plot was harvested
Year	The year in which the plot was harvested
Species	The scientific name of the geophyte that was harvested
CommonName	The common name known by the foragers of the geophyte species that was harvested
PlantsNotHarvested_n	Once the foragers had completed the task of all edible geophytes from the plot, the main researcher would investigate the plot to see if anything got left behind
Comment on what was left behind	Once the researcher had established whether any individual geophytes were left behind after the foragers said that they had extracted all edible geophytes, the main researcher would count how many geophytes were not extracted and then ask the foragers why they were left behind
CODE	An alphabetic letter assigned to each comment to catergorise the comments (see spreadsheet 5.CodeCategories)
Constraint	The codes were assigned to another two categories: plant constraint vs forager constraint
Spreadsheet 3: Plotinfo
Order	Order in which the data was entered. 1 = the first data entry
PlotNo	The unique number assigned to each unique plot
Location	The descriptive name for the plot based on its location
Veg.type	The vegetation type in which the plot occurs
WP	The number as it is stored on the gps device that pinpoint the location of each corner of each plot
Age of fynbos site at the time of first harvest (2015)	The number of years since the last fire in each of the fynbos plots as determined by counting protea nodes
Aspect	If the plot had a slope, the direction which the slope faces
Comments2015	The comments made by the foragers about clearing any particular plot in the year 2015
Comments2016	The comments made by the foragers about clearing any particular plot in the year 2016
Dominant species present	The dominant woody perennial shrubs/small trees that occur within and around the plot and gives an indication of the vegetation composition in which the plot occurs
No of plants not dug up	The no of plants that were left behind in any given plot after foragers had completed harvesting all of the edible geophytes
Comment on what was left behind	Comments by the main researcher on the plot and foraging in general and what was left behind
Soil Compaction measurement (1)	A ruler was pushed into the soil at random locations within the plot to determine soil compaction. The deeper the ruler could be inserted, the softer the sand was, and therefore, more likely easier to dig.
Soil Compaction measurement (2)	A ruler was pushed into the soil at random locations within the plot to determine soil compaction. The deeper the ruler could be inserted, the softer the sand was, and therefore, more likely easier to dig.
Soil Compaction measurement (3)	A ruler was pushed into the soil at random locations within the plot to determine soil compaction. The deeper the ruler could be inserted, the softer the sand was, and therefore, more likely easier to dig.
Soil Compaction measurement (4)	A ruler was pushed into the soil at random locations within the plot to determine soil compaction. The deeper the ruler could be inserted, the softer the sand was, and therefore, more likely easier to dig.
GPS CO-ORDS	The number as it is stored on the gps device that pinpoint the location of each corner of each plot
Lat	The latitude co-ordinate that marks the location of the plot
Long	The longitude co-ordinate that marks the location of the plot
Spreadsheet 4:CODES
Column: Order	Order in which the data was entered. 1 = the first data entry
Column: PlotNo	The unique number assigned to each unique plot
Column: Location	The descriptive name for the plot based on its location
Column: Date	The date when the plot was harvested
Column: Species	The scientific name of the geophyte that was harvested
Column: Common name	The common name known by the foragers of the geophyte species that was harvested
Column: Part collected	The part of the geophyte that was extracted by the foragers
Column: Edible.weight.count	The number of plants that were harvested that can be eaten
Column: Processing time (mins)	The time it took to clean the plants to extract the edible portion
No of plants not dug up	Once the foragers had completed the task of all edible geophytes from the plot, the main researcher would investigate the plot to see if anything got left behind
Column: Comment on what was left behind	Once the researcher had established whether any individual geophytes were left behind after the foragers said that they had extracted all edible geophytes, the main researcher would count how many geophytes were not extracted and then ask the foragers why they were left behind
Column: CODE	An alphabetic letter assigned to each comment to catergorise the comments (see spreadsheet 5.CodeCategories)
Column: Constraint	The codes were assigned to another two categories: plant constraint vs forager constraint
Spreadsheet 5:CodeMeaning
CODE	An alphabetic letter assigned to each comment to catergorise the comments (see spreadsheet 5.CodeCategories)
CODE	The comment given by the forager
FREQUENCY	The number of times each category occurred

## Sheet: ShorthandMetadata
Sheet name	Column header	Explaining the column heading
Plot	Order	Puts the data in plot and date order
Plot	Plot number	The number, randomly assigned to each plot
Plot	Location	The name of the plot so I know which one it is
Plot	Date	Date of the year that the plot was harvested
Plot	mm/dd/year	Date of the year that the plot was harvested, different format
Plot	Name	Name of the forager who gathered the food
Plot	Start	the start time the plot was harvested
Plot	Stop	the end time the plot was harvested
Plot	Species	the plant species that was harvested
Plot	Common name	the common name of the plant that was harvested
Plot	Part collected	the part of the plant that was harvested
Plot	Gross weight (kg)	the gross weigh of the plant that was harvested before removing non-edible parts
Plot	Gross weight (Count)	the number of plants that were harvested before cleaning the plants, which rarely, you may then find, some plants are old/damaged so they are not edible
Plot	Edible weight (kg)	The edible weight of the plants that were harvested, minus the parts that were cleaned off that are inedible
Plot	Edible weight (count)	the number of plants that were harvested that can be eaten
Plot	Processing time (mins)	the time it took to clean the plants to extract the edible portion
Plot	Veg.type	the type of vegetation in which the plot was laid out
Plot	WP	The waypoint names of the plot corners of each plot
Plot	Age	the age of the site, if it was in fynbos, determined by counting the node intervals on Leucadendrons in or near the plot location
Plot	Aspect	the aspect of the site
Plot	Comments	Comments of the nature of the site, ease of digging, comments by the foragers
Plot	Dominant species present	The dominant canopy plant species within the plot and around the plot
Plot	No of plants not dug up	The plants that were left behind after the foragers were done clearing the plot
Plot	Comment on what was left behind	After the foragers said that they were done clearing the plot, I would re-visit the plot and check whether anything was missed, and record what species were left behind and how many of each
Plot	CODE	The code assigned to the plot to explain the reason certain plant species were not harvested
Plot	Soil Compaction measurement (1)	A ruler was pushed into the ground at four random points within each plot and the depth to which the ruler could penetrate was recorded. The deeper the ruler could penetrate, the looser/softer the soil substrata.
Plot	Soil Compaction measurement (2)	A ruler was pushed into the ground at four random points within each plot and the depth to which the ruler could penetrate was recorded. The deeper the ruler could penetrate, the looser/softer the soil substrata.
Plot	Soil Compaction measurement (3)	A ruler was pushed into the ground at four random points within each plot and the depth to which the ruler could penetrate was recorded. The deeper the ruler could penetrate, the looser/softer the soil substrata.
Plot	Soil Compaction measurement (4)	A ruler was pushed into the ground at four random points within each plot and the depth to which the ruler could penetrate was recorded. The deeper the ruler could penetrate, the looser/softer the soil substrata.
Plot	GPS CO-ORDS	The name of one of the gps co-ordinates that was recorded to mark the plot was used to mark the site on a map
Plot	Lat	The coordinates of the waypoint used to mark the plot on a map
Plot	Long	The coordinates of the waypoint used to mark the plot on a map
Code	CODE	The code assigned to each reason explaining why certain plants were left behind after the foragers were done clearing the plot (10 by 10m)
Code	REASON	The different reasons why certain plants were not harvested/ cleared by the foragers during the time they cleared the plot. The time they were given was unlimited and the instruction was that they had as much time as they needed to clear the plot of edible food
Plot number	GPS.Plots	The original plot number as in sheet: Plot
Location	GPS.Plots	The location of the plot as in sheet: Plot
GPS CO-ORDS	GPS.Plots	The name of the waypoint that was chosen to mark the plot on a map
WP S	GPS.Plots	The longitude of waypoint
WP N	GPS.Plots	The latitude of waypoint
longitude(Dec)	GPS.Plots	The longitude of waypoint in decimals (the decimal figure was obtained from the waypoint spreadsheet that captures all waypoints in the study)
latitude(Dec)	GPS.Plots	The latitude of waypoint in decimals (the decimal figure was obtained from the waypoint spreadsheet that captures all waypoints in the study)

## Sheet: 1.InPlot_Harvested
Order	PlotNo	Date	Year	Forager ID	StartTime	StopTime	Duration_min	Species	CommonName	PartCollected	GrossWt_lb	GrossWt_n	EdibleWt_lb	EdibleWt_g	EdibleWt_n	ProcessingTime_min
84	Plot18	2015-08-27	2015	1	12:36:00	13:26:00	50	Ferraria crispa	?	Corm			0.28	127.01	93	3
1	Plot01	2015-09-03	2015	2	13:59:00	16:46:00	167	Babiana patula	bobbejaantjie	Corm	0.02	2	0.0517	23.45	2
2	Plot01	2015-09-03	2015	2	13:59:00	16:46:00	167	Cyphia digitata	baroe	Tuber			0.075	34.02	1
6	Plot01	2016-09-01	2016	2	13:40:00	14:42:00	62	Babiana patula	bobbejaantjie	Corm			0.06	27.22	4
14	Plot11	2015-11-06	2015	2	10:20:00	11:00:00	40	Conicosia pugioniformis	varkwortel	Root			0.24	108.86	22
16	Plot11	2015-11-06	2015	2	10:20:00	11:00:00	40	Pelargonium triste	kaneelbol	Tuber			0.05	22.68	3
23	Plot12	2015-11-06	2015	2	12:18:00	12:32:00	14	Cassine perugua		berries	0.195	147	0.11	49.9	147
24	Plot12	2015-11-06	2015	2	12:18:00	12:32:00	14	Osteospermum monolifera	bietou	berries	0.02	1	0.01	4.54	1
26	Plot12	2015-11-06	2015	2	12:18:00	12:32:00	14	Pelargonium lobatum	platblaar patat	Tuber			0.46	208.65	5
27	Plot12	2015-11-06	2015	2	12:18:00	12:32:00	14	Searsia glauca		berries	0.05	138	0.03	13.61	138
43	Plot14	2015-08-25	2015	2	11:07:00	11:59:00	52	Babiana patula	bobbejaantjie	Corm	0.05	2	0.02	9.07	2
45	Plot14	2015-08-25	2015	2	11:07:00	11:59:00	52	Pelargonium lobatum	platblaar patat	Tuber			0.205	92.99	18
48	Plot14	2015-08-25	2015	2	11:07:00	11:59:00	52	Wachendorfia paniculata	?	Bulb			0.02	9.07	11
57	Plot15	2015-08-25	2015	2	13:55:00	14:31:00	36	Babiana ambigua	bobbejaantjie	Corm			0.015	6.8	2
59	Plot15	2015-08-25	2015	2	13:55:00	14:31:00	36	Pelargonium lobatum	platblaar patat	Tuber			0.18	81.65	6
61	Plot15	2015-08-25	2015	2	13:55:00	14:31:00	36	Pelargonium triste	kaneelbol	Tuber			0.045	20.41	1
67	Plot16	2015-08-26	2015	2	12:01:00	14:01:00	120	Chasmanthe aethiopica	pypie	Corm			0.37	167.83	59
71	Plot16	2015-08-26	2015	2	12:01:00	14:01:00	120	Pelargonium triste	kaneelbol	Tuber			0.08	36.29	1
78	Plot17	2015-08-26	2015	2	16:26:00	17:20:00	54	Kedrostis nana	?	Tuber			0.25	113.4	2
78	Plot17	2015-08-26	2015	2	16:26:00	17:20:00	54	Kedrostis nana	?	Tuber			0.25	113.4	2
92	Plot19	2015-09-02	2015	2	12:04:00	12:31:00	27	Babiana patula	bobbejaantjie	Corm			0.01	4.54	1
112	Plot20	2015-09-03	2015	2	09:24:00	11:34:00	130	Babiana patula	bobbejaantjie	Corm	0.02	2	0.01	4.54	2	0.5
115	Plot20	2015-09-03	2015	2	09:24:00	11:34:00	130	Pelargonium repaceum		Tuber	0.53	46	0.515	233.6	46	2
116	Plot20	2015-09-03	2015	2	09:24:00	11:34:00	130	Satyrium longicolle	Satyrium spp. (1 and 2)	Tuber	0.095	21	0.055	24.95	15	0.5
120	Plot20	2016-09-03	2016	2	14:30:00	15:31:00	61	Babiana patula	bobbejaantjie	Corm			0.01	4.54	1
128	Plot03	2016-08-30	2016	2	15:30:00	16:30:00	60	Babiana patula	bobbejaantjie	Corm	0.06	2	0.03	13.61	2
130	Plot03	2016-08-30	2016	2	15:30:00	16:30:00	60	Pelargonium repaceum		Tuber			0.07	31.75	1
150	Plot05	2016-09-02	2016	2	13:22:00	15:39:00	137	Oxalis pes-caprae	suuring	Leaves			0.5	226.8	1297.27
153	Plot06	2015-10-05	2015	2	10:46:00	12:14:00	88	Chasmanthe aethiopica	pypie	Corm			0.93	421.84	210
159	Plot07	2015-10-05	2015	2	14:00:00	15:00:00	60	Satyrium carneum	?	Tuber			0.82	371.95	230
171	Plot08	2015-10-06	2015	2	11:02:00	12:45:00	103	Babiana patula	bobbejaantjie	Corm	0.03	1	0.025	11.34	1
174	Plot08	2015-10-06	2015	2	11:02:00	12:45:00	103	Hyacinthaceae	? anna	Bulb	0.07	10	0.045	20.41	10
179	Plot08	2015-10-06	2015	2	11:02:00	12:45:00	103	Watsonia sp	oranje waspypie	Corm	0.098	3	0.03	13.61	3
189	Plot08	2016-08-30	2016	2	13:30:00	14:31:00	61	Babiana patula	bobbejaantjie	Corm	0.06	2	0.03	13.61	2
192	Plot08	2016-08-30	2016	2	13:30:00	14:31:00	61	Tritonia crocata	Hanekammetjie	Corm			0.4	181.44	93
193	Plot08	2016-08-30	2016	2	13:30:00	14:31:00	61	Pelargonium lobatum	platblaar patat	Tuber			0.75	340.19	7
195	Plot08	2016-08-30	2016	2	13:30:00	14:31:00	61	Pelargonium repaceum		Tuber			0.07	31.75	1
196	Plot08	2016-08-30	2016	2	13:30:00	14:31:00	61	Unknown sp 3	Krismis blom		0.07	1	0.3	136.08	1
201	Plot09	2015-10-06	2015	2	15:35:00	16:52:00	77	Albuca goswinii	?	Bulb	0.21	27	0.15	68.04	27
203	Plot09	2015-10-06	2015	2	15:35:00	16:52:00	77	Cyphia digitata	baroe	Tuber			0.29	131.54	5
207	Plot09	2015-10-06	2015	2	15:35:00	16:52:00	77	Tritonia crocata	kalkoentjie	Corm	0.1	29	0.02	9.07	29	8
212	Plot09	2016-08-30	2016	2	10:35:00	12:03:00	88	Cyphia digitata	baroe	Tuber			0.5	226.8	7
215	Plot09	2016-08-30	2016	2	10:35:00	12:03:00	88	Tritonia crocata	kalkoentjie	Corm	0.18	44	0.054	24.49	44
247	Plot02	2017-09-02	2017	2	14:00:00	15:02:00	62	Gladiolus teretifolius	Rooi pypie	Corm			0.03	13.61	2
249	Plot02	2017-09-02	2017	2	14:00:00	15:02:00	62	Satyrium longicolle	Satyrium gloss	Tuber			0.1	45.36	8
250	Plot06	2017-09-02	2017	2	10:32:00	10:40:00	8	Chasmanthe aethiopica	pypie	Corm			0.07	31.75	7
252	Plot07	2017-09-02	2017	2	10:19:00	10:41:00	22	Satyrium carneum		Tuber			0.73	331.12	27
255	Plot07	2017-09-02	2017	2	10:19:00	10:41:00	22	Babiana ambigua	bobbejaantjie	Corm			0.07	31.75	11
258	Plot12	2017-09-02	2017	2	09:17:00	09:52:00	35	Pelargonium lobatum	platblaar patat	Tuber			0.09	40.82	4
259	Plot12	2017-09-02	2017	2	09:17:00	09:52:00	35	Chasmanthe aethiopica	pypie	Corm			0.03	13.61	1
260	Plot12	2017-09-02	2017	2	09:17:00	09:52:00	35	Babiana ambigua	bobbejaantjie	Corm			0.09	40.82	5
261	Plot20	2017-09-02	2017	2	13:02:00	13:26:00	24	Gladiolus teretifolius	Rooi pypie	Corm			0.7	317.51	3
263	Plot03	2017-09-04	2017	2	12:46:00	13:26:00	40	Babiana patula	bobbejaantjie	Corm			0.08	36.29	4
265	Plot08	2017-09-04	2017	2	14:26:00	15:31:00	65	Pelargonium lobatum	platblaar patat	Tuber			0.27	122.47	13
266	Plot08	2017-09-04	2017	2	14:26:00	15:31:00	65	Tritonia crocata	Hanekammetjie	Corm			0.08	36.29	27
268	Plot09	2017-09-04	2017	2	16:12:00	17:11:00	59	Cyphia digitata	baroe	Tuber			0.35	158.76	4
271	Plot09	2017-09-04	2017	2	16:12:00	17:11:00	59	Babiana patula	bobbejaantjie	Corm			0.03	13.61	3
272	Plot18	2017-09-04	2017	2	10:05:00	10:55:00	50	Cyphia digitata	baroe	Tuber			0.32	145.15	4
274	Plot18	2017-09-04	2017	2	10:05:00	10:55:00	50	Ferraria crispa		Corm			0.07	31.75	1
41	Plot13	2016-10-19	2016	3	14:41:00	15:27:00	46	Prionium serratum	palmiet	Meristem			1.52	689.46	5
85	Plot18	2015-08-27	2015	4	12:36:00	13:26:00	50	Ferraria crispa	?	Corm			0.335	151.95	153
99	Plot02	2015-09-07	2015	5	09:49:00	12:21:00	152	Cyphia digitata	baroe	Tuber			0.05	22.68	7
102	Plot02	2015-09-07	2015	5	09:49:00	12:21:00	152	Satyrium longicolle	?	Tuber			0.535	242.67	100
125	Plot03	2015-09-08	2015	5	12:35:00	13:13:00	38	Babiana patula	bobbejaantjie	Corm	0.08	7	0.0192	8.71	7	2.5
132	Plot04	2015-09-09	2015	5	12:27:00	13:01:00	34	Freesia sp	vrot patat/ Mike bulb	Corm	0.0225	4	0.01	4.54	4
141	Plot05	2015-09-09	2015	5	14:20:00	16:20:00	120	Oxalis pes-caprae	suuring	Leaves			1.5	680.39	207
142	Plot05	2015-09-09	2015	5	14:20:00	16:20:00	120	Oxalis pes-caprae	suuring (nuts)	nuts			0.03	13.61	141
144	Plot05	2015-09-09	2015	5	14:20:00	16:20:00	120	Oxalis pes-caprae	suuring (Root)	Root			0.145	65.77	0
15	Plot11	2015-11-06	2015	6	10:20:00	11:00:00	40	Conicosia pugioniformis	varkwortel	Root			0.26	117.93	10
25	Plot12	2015-11-06	2015	6	12:18:00	12:32:00	14	Pelargonium lobatum	platblaar patat	Tuber			0.265	120.2	3
28	Plot12	2015-11-06	2015	6	12:18:00	12:32:00	14	Searsia glauca		berries	0.305	790	0.08	36.29	790
36	Plot13	2015-11-12	2015	6	09:54:00	12:07:00	133	Prionium serratum	palmiet	Meristem	22.03	59	4.59	2081.99	59	36
136	Plot04	2016-09-02	2016	7	11:28:00	12:13:00	45	Freesia sp	vrot patat/ Mike bulb	Corm	0.04	4	0.04	18.14	4
137	Plot04	2016-09-02	2016	7	11:28:00	12:13:00	45	Euphorbia burmannii	bobbejaanbolle				0.37	167.83	120
147	Plot05	2016-09-02	2016	7	13:22:00	15:39:00	137	Oxalis pes-caprae	suuring	Leaves			0.27	122.47	700.53
217	Plot04	2017-08-31	2017	7	12:49:00	13:29:00	40	Euphorbia burmannii	bobbejaanbolle				0.24	108.86	57
218	Plot04	2017-08-31	2017	7	12:49:00	13:29:00	40	Freesia sp	vrot patat/ Mike bulb	Corm			0.03	13.61	3
220	Plot05	2017-08-31	2017	7	13:52:00	14:17:00	25	Mesembryanthemum atenus		Leaves			2.43	1102.23	20
221	Plot10	2017-08-31	2017	7	10:02:00	10:52:00	50	Watsonia fourcadii	pypie	Corm			0.06	27.22	4
224	Plot10	2017-08-31	2017	7	10:02:00	10:52:00	50	Unknown sp 9	Langblaar	Corm			0.02	9.07	17
225	Plot01	2017-09-01	2017	8	14:30:00	14:50:00	20	None	NA	NA	NA	NA	NA	NA	NA	NA
228	Plot14	2017-09-01	2017	8	13:15:00	14:00:00	45	Pelargonium lobatum	platblaar patat	Tuber			0.29	131.54	11
232	Plot14	2017-09-01	2017	8	13:15:00	14:00:00	45	Asparagus asparagoides	creeper	Tuber			0.55	249.48	2
235	Plot15	2017-09-01	2017	8	11:19:00	11:47:00	28	Euphorbia burmannii					0.04	18.14	4
236	Plot16	2017-09-01	2017	8	09:00:00	09:40:00	40	Chasmanthe aethiopica	pypie	Corm			0.12	54.43	6
241	Plot17	2017-09-01	2017	8	10:19:00	10:41:00	22	Kedrostis nana		Tuber			0.12	54.43	1
244	Plot19	2017-09-01	2017	8	15:55:00	16:25:00	30	Unknown sp 10					0.07	31.75	1
9	Plot10	2015-10-09	2015	9	11:03:00	12:55:00	112	Watsonia fourcadii	waspypie	Corm	7.725	148	2.12	961.62	148	57
100	Plot02	2015-09-07	2015	10	09:49:00	12:21:00	152	Cyphia digitata	baroe	Tuber			0.015	6.8	4
101	Plot02	2015-09-07	2015	10	09:49:00	12:21:00	152	Satyrium longicolle	?	Tuber			0.49	222.26	88
126	Plot03	2015-09-08	2015	10	12:35:00	13:13:00	38	Babiana patula	bobbejaantjie	Corm	0.1	10	0.025	11.34	10	2.5
133	Plot04	2015-09-09	2015	10	12:27:00	13:01:00	34	Freesia sp	vrot patat/ Mike bulb	Corm	0.0225	4	0.01	4.54	4
140	Plot05	2015-09-09	2015	10	14:20:00	16:20:00	120	Oxalis pes-caprae	suuring	Leaves			1.25	566.99	250
143	Plot05	2015-09-09	2015	10	14:20:00	16:20:00	120	Oxalis pes-caprae	suuring (nuts)	nuts			0.03	13.61	200
145	Plot05	2015-09-09	2015	10	14:20:00	16:20:00	120	Oxalis pes-caprae	suuring (Root)	Root			0.2	90.72	0
8	Plot10	2015-10-09	2015	11	11:03:00	12:55:00	112	Watsonia fourcadii	waspypie	Corm	5.68	146	2.085	945.74	146	40
	Plot13	2017-12-31	2017	12	14:43:00	15:40:00	57	Prionium serratum	palmiet	Meristem			0.94	426.38	14
37	Plot13	2015-11-12	2015	13	09:54:00	12:07:00	133	Prionium serratum	palmiet	Meristem	12.315	44	4	1814.37	58
88	Plot18	2016-08-31	2016	14	10:35:00	14:31:00	236	Cyphia digitata	baroe	Tuber			0.11	49.9	2
40	Plot13	2016-10-19	2016	15	14:41:00	15:27:00	46	Prionium serratum	palmiet	Meristem			2.78	1260.99	10
264	Plot03	2017-09-04	2017	16	12:46:00	13:26:00	40	Unknown sp 4					0.06	27.22	1
267	Plot08	2017-09-04	2017	16	14:26:00	15:31:00	65	Tritonia crocata	Hanekammetjie	Corm			0.07	31.75	17
269	Plot09	2017-09-04	2017	16	16:12:00	17:11:00	59	Cyphia digitata	baroe	Tuber			0.02	9.07	1
270	Plot09	2017-09-04	2017	16	16:12:00	17:11:00	59	Tritonia crocata		Corm			0.04	18.14	4
273	Plot18	2017-09-04	2017	16	10:05:00	10:55:00	50	Ferraria crispa		Corm			0.14	63.5	27
12	Plot10	2016-09-04	2016	17	10:48:00	11:27:00	39	Watsonia fourcadii	waspypie	Corm			1.25	566.99	40	white: 0.9(40)
89	Plot18	2016-08-31	2016	17	10:35:00	14:31:00	236	Cyphia digitata	baroe	Tuber			1.15	521.63	10
135	Plot04	2016-09-02	2016	17	11:28:00	12:13:00	45	Freesia sp	vrot patat/ Mike bulb	Corm	0.04	4	0.03	13.61	4
138	Plot04	2016-09-02	2016	17	11:28:00	12:13:00	45	Euphorbia burmannii	bobbejaanbolle				0.42	190.51	118
149	Plot05	2016-09-02	2016	17	13:22:00	15:39:00	137	Oxalis pes-caprae	suuring	Leaves			0.41	185.97	1063.76
216	Plot04	2017-08-31	2017	17	12:49:00	13:29:00	40	Euphorbia burmannii	bobbejaanbolle				0.31	140.61	78
219	Plot05	2017-08-31	2017	17	13:52:00	14:17:00	25	Mesembryanthemum atenus		Leaves			2.41	1093.16	20
222	Plot10	2017-08-31	2017	17	10:02:00	10:52:00	50	Watsonia fourcadii	pypie	Corm			0.04	18.14	3
223	Plot10	2017-08-31	2017	17	10:02:00	10:52:00	50	Unknown sp 9	Langblaar	Corm			0.03	13.61	28
11	Plot10	2016-09-04	2016	18	10:48:00	11:27:00	39	Watsonia fourcadii	waspypie	Corm			0.53	240.4	16	white: 0.31(16)
18	Plot11	2016-09-01	2016	19	11:20:00	12:02:00	42	Conicosia pugioniformis	varkwortel	Root	0.49	7	0.15	68.04	7
32	Plot12	2016-09-01	2016	19	13:50:00	14:33:00	43	Chasmanthe aethiopica	pypie	Corm			0.22	99.79	10
34	Plot12	2016-09-01	2016	19	13:50:00	14:33:00	43	Pelargonium lobatum	platblaar patat	Tuber			0.34	154.22	6
46	Plot14	2015-08-25	2015	19	11:07:00	11:59:00	52	Pelargonium lobatum	platblaar patat	Tuber			0.285	129.27	24	1
52	Plot14	2016-09-01	2016	19	08:22:00	09:11:00	49	Babiana patula	bobbejaantjie	Corm	0.08	2	0.06	27.22	2
53	Plot14	2016-09-01	2016	19	08:22:00	09:11:00	49	Chasmanthe aethiopica	pypie	Corm			0.01	4.54	1
55	Plot14	2016-09-01	2016	19	08:22:00	09:11:00	49	Pelargonium lobatum	platblaar patat	Tuber			0.83	376.48	26
60	Plot15	2015-08-25	2015	19	13:55:00	14:31:00	36	Pelargonium lobatum	platblaar patat	Tuber			0.615	278.96	8	1
64	Plot15	2016-09-01	2016	19	10:06:00	10:38:00	32	Pelargonium lobatum	platblaar patat	Tuber			0.08	36.29	4
65	Plot15	2016-09-01	2016	19	10:06:00	10:38:00	32	Pelargonium triste	kaneelbol	Tuber			0.08	36.29	2
68	Plot16	2015-08-26	2015	19	12:01:00	14:01:00	120	Chasmanthe aethiopica	pypie	Corm			0.57	258.55	64
70	Plot16	2015-08-26	2015	19	12:01:00	14:01:00	120	Microloma saggitatum	Por – porkie	seedpod			0.065	29.48	2
74	Plot16	2016-09-01	2016	19	15:18:00	16:05:00	47	Chasmanthe aethiopica	pypie	Corm			0.6	272.16	36	white: .35(26)
77	Plot17	2015-08-26	2015	19	16:26:00	17:20:00	54	Kedrostis nana	?	Tuber			0.02	9.07	2
81	Plot17	2016-09-03	2016	19	08:44:00	09:33:00	49	Euphorbia burmannii	bobbejaanbolle				0.69	312.98	100
81	Plot17	2016-09-03	2016	19	08:44:00	09:33:00	49	Kedrostis nana					0	0	0
95	Plot19	2016-09-04	2016	19	08:39:00	09:00:00	21	Babiana patula	bobbejaantjie	Corm			0.02	9.07	1
97	Plot19	2016-09-04	2016	19	08:39:00	09:00:00	21	Babiana patula	bobbejaantjie	Corm			0.01	4.54	1
107	Plot02	2016-09-01	2016	19	10:15:00	13:00:00	165	Satyrium longicolle		Tuber			0.74	335.66	86
121	Plot20	2016-09-03	2016	19	14:30:00	15:31:00	61	Babiana patula	bobbejaantjie	Corm			0.01	4.54	1
123	Plot20	2016-09-03	2016	19	14:30:00	15:31:00	61	Satyrium longicolle		Tuber			0.11	49.9	20
152	Plot06	2015-10-05	2015	19	10:46:00	12:14:00	88	Chasmanthe aethiopica	pypie	Corm			0.695	315.25	68
158	Plot07	2015-10-05	2015	19	14:00:00	15:00:00	60	Satyrium carneum	?	Tuber			0.525	238.14	143
162	Plot07	2016-09-03	2016	19	11:29:00	12:15:00	46	Albuca fragrans		Bulb	0.11	1	0.09	40.82	1
165	Plot07	2016-09-03	2016	19	11:29:00	12:15:00	46	Babiana tubulosa	bobbejaantjie (Babiana white)	Corm			0.08	36.29	8
166	Plot07	2016-09-03	2016	19	11:29:00	12:15:00	46	Chasmanthe aethiopica	pypie	Corm			0.08	36.29	6
168	Plot07	2016-09-03	2016	19	11:29:00	12:15:00	46	Satyrium carneum	?	Tuber			0.87	394.63	80
44	Plot14	2015-08-25	2015	20	11:07:00	11:59:00	52	Babiana patula	bobbejaantjie	Corm			0.025	11.34	4
47	Plot14	2015-08-25	2015	20	11:07:00	11:59:00	52	Pelargonium lobatum	platblaar patat	Tuber			0.375	170.1	20
49	Plot14	2015-08-25	2015	20	11:07:00	11:59:00	52	Wachendorfia paniculata	?	Bulb			0.035	15.88	30
58	Plot15	2015-08-25	2015	20	13:55:00	14:31:00	36	Babiana ambigua	bobbejaantjie	Corm			0.03	13.61	3
62	Plot15	2015-08-25	2015	20	13:55:00	14:31:00	36	Pelargonium triste	kaneelbol	Tuber			0.045	20.41	1	1
	Plot13	2017-12-31	2017	21	14:43:00	15:40:00	57	Prionium serratum	palmiet	Meristem			1.175	532.97	18
80	Plot17	2016-09-03	2016	22	08:44:00	09:33:00	49	Euphorbia burmannii	bobbejaanbolle				0.32	145.15	56
122	Plot20	2016-09-03	2016	22	14:30:00	15:31:00	61	Babiana patula	bobbejaantjie	Corm			0.07	31.75	8
156	Plot06	2016-09-03	2016	22	10:15:00	11:01:00	46	Chasmanthe aethiopica	pypie	Corm			0.22	99.79	29
161	Plot07	2016-09-03	2016	22	11:29:00	12:15:00	46	Albuca fragrans		Bulb			0.08	36.29	1
163	Plot07	2016-09-03	2016	22	11:29:00	12:15:00	46	Gladiolus carinatus	Blue bell	Corm			0.001	0.45	1
164	Plot07	2016-09-03	2016	22	11:29:00	12:15:00	46	Babiana tubulosa	bobbejaantjie (Babiana white)	Corm			0.06	27.22	1
167	Plot07	2016-09-03	2016	22	11:29:00	12:15:00	46	Satyrium carneum	?	Tuber			0.83	376.48	65
39	Plot13	2016-10-19	2016	23	14:41:00	15:27:00	46	Prionium serratum	palmiet	Meristem			6.04	2739.7	31
3	Plot01	2015-09-03	2015	24	13:59:00	16:46:00	167	Cyphia digitata	baroe	Tuber			0.1	45.36	1
5	Plot01	2016-09-01	2016	24	13:40:00	14:42:00	62	Babiana patula	bobbejaantjie	Corm			0.08	36.29	6
19	Plot11	2016-09-01	2016	24	11:20:00	12:02:00	42	Conicosia pugioniformis	varkwortel	Root	1.12	13	0.32	145.15	13
20	Plot11	2016-09-01	2016	24	11:20:00	12:02:00	42	Pelargonium triste	kaneelbol	Tuber	0.13	1	0.08	36.29	1
21	Plot11	2016-09-01	2016	24	11:20:00	12:02:00	42	Unknown sp 6	Grass bulb				0.01	4.54	1
30	Plot12	2016-09-01	2016	24	13:50:00	14:33:00	43	Babiana ambigua	bobbejaantjie	Corm	0.11	6	0.06	27.22	6
31	Plot12	2016-09-01	2016	24	13:50:00	14:33:00	43	Chasmanthe aethiopica	pypie	Corm			0.09	40.82	3
33	Plot12	2016-09-01	2016	24	13:50:00	14:33:00	43	Pelargonium lobatum	platblaar patat	Tuber			0.29	131.54	4
51	Plot14	2016-09-01	2016	24	08:22:00	09:11:00	49	Babiana patula	bobbejaantjie	Corm	0.02	2	0.01	4.54	1
54	Plot14	2016-09-01	2016	24	08:22:00	09:11:00	49	Pelargonium lobatum	platblaar patat	Tuber			0.44	199.58	14
69	Plot16	2015-08-26	2015	24	12:01:00	14:01:00	120	Chasmanthe aethiopica	pypie	Corm			0.82	371.95	300
73	Plot16	2016-09-01	2016	24	15:18:00	16:05:00	47	Chasmanthe aethiopica	pypie	Corm			0.35	158.76	26	white: .24(26)
76	Plot17	2015-08-26	2015	24	16:26:00	17:20:00	54	Kedrostis nana	?	Tuber			0.195	88.45	5
83	Plot18	2015-08-27	2015	24	12:36:00	13:26:00	50	Ferraria crispa	?	Corm			0.21	95.25	50	3
86	Plot18	2015-08-27	2015	24	12:36:00	13:26:00	50	Pelargonium lobatum	platblaar patat	Tuber			0.05	22.68	1
93	Plot19	2015-09-02	2015	24	12:04:00	12:31:00	27	Babiana patula	bobbejaantjie	Corm	0.015	3	0.01	4.54	3	1
96	Plot19	2016-09-04	2016	24	08:39:00	09:00:00	21	Babiana patula	bobbejaantjie	Corm			0.04	18.14	2
104	Plot02	2016-09-01	2016	24	10:15:00	13:00:00	165	Cyphia digitata	baroe	Tuber			0.07	31.75	2
105	Plot02	2016-09-01	2016	24	10:15:00	13:00:00	165	Eriospermum sp	Takblaar	Tuber			0.11	49.9	5
106	Plot02	2016-09-01	2016	24	10:15:00	13:00:00	165	Satyrium longicolle		Tuber	0.18	22	0.11	49.9	22
108	Plot02	2016-09-01	2016	24	10:15:00	13:00:00	165	Unknown sp 3	Krismis blom		0.09	5		0
113	Plot20	2015-09-03	2015	24	09:24:00	11:34:00	130	Babiana patula	bobbejaantjie	Corm	0.01	1	0.01	4.54	1	0.5
114	Plot20	2015-09-03	2015	24	09:24:00	11:34:00	130	Pelargonium repaceum		Tuber	0.105	16	0.09	40.82	16	0.5
117	Plot20	2015-09-03	2015	24	09:24:00	11:34:00	130	Satyrium longicolle	Satyrium spp. (1 and 2)	Tuber	0.125	40	0.075	34.02	40	0.5
118	Plot20	2015-09-03	2015	24	09:24:00	11:34:00	130	Unknown sp 11	?				0.02	9.07	5
129	Plot03	2016-08-30	2016	24	15:30:00	16:30:00	60	Babiana patula	bobbejaantjie	Corm	0.07	4	0.04	18.14	4
148	Plot05	2016-09-02	2016	24	13:22:00	15:39:00	137	Oxalis pes-caprae	suuring	Leaves			0.36	163.29	934.04
155	Plot06	2016-09-03	2016	24	10:15:00	11:01:00	46	Chasmanthe aethiopica	pypie	Corm			0.21	95.25	25
170	Plot08	2015-10-06	2015	24	11:02:00	12:45:00	103	Babiana patula	bobbejaantjie	Corm	0.025	1	0.02	9.07	1
172	Plot08	2015-10-06	2015	24	11:02:00	12:45:00	103	Drimia elata	plat kleinblaar	Bulb			0.05	22.68	13
173	Plot08	2015-10-06	2015	24	11:02:00	12:45:00	103	Eriospermum pubescens	hairy satyrium	Tuber	0.045	9	0.045	20.41	9
175	Plot08	2015-10-06	2015	24	11:02:00	12:45:00	103	Hyacinthaceae	? Anna	Bulb	0.035	6	0.025	11.34	1
176	Plot08	2015-10-06	2015	24	11:02:00	12:45:00	103	Pelargonium lobatum	platblaar patat	Tuber			0.065	29.48	4
177	Plot08	2015-10-06	2015	24	11:02:00	12:45:00	103	Tritonia crocata	kalkoentjie	Corm	0.165	51	0.07	31.75	51
178	Plot08	2015-10-06	2015	24	11:02:00	12:45:00	103	Tritonia crocata	kalkoentjie	Corm	0.14	95	0.07	31.75	95	15
180	Plot08	2015-10-06	2015	24	11:02:00	12:45:00	103	Unknown sp 8	purple stem		0.02	1	0.015	6.8	1
181	Plot08	2015-10-06	2015	24	11:02:00	12:45:00	103	Unknown sp 1	tight lachenalia	Bulb	0.06	2	0.05	22.68	2	1
182	Plot08	2015-10-06	2015	24	11:02:00	12:45:00	103	Boophone guttata	hairy catcher	Bulb	0.035	2	0.034	15.42	2	1
190	Plot08	2016-08-30	2016	24	13:30:00	14:31:00	61	Babiana patula	bobbejaantjie	Corm	0.07	4	0.04	18.14	4
191	Plot08	2016-08-30	2016	24	13:30:00	14:31:00	61	Tritonia crocata	Hanekammetjie	Corm			0.32	145.15	60
194	Plot08	2016-08-30	2016	24	13:30:00	14:31:00	61	Pelargonium lobatum	platblaar patat	Tuber			0.32	145.15	5
199	Plot09	2015-10-06	2015	24	15:35:00	16:52:00	77	Unknown sp 5	??		0.025	5		0
200	Plot09	2015-10-06	2015	24	15:35:00	16:52:00	77	Albuca goswinii	?	Bulb	0.15	33	0.115	52.16	33
202	Plot09	2015-10-06	2015	24	15:35:00	16:52:00	77	Cyphia digitata	baroe	Tuber			0.055	24.95	2
204	Plot09	2015-10-06	2015	24	15:35:00	16:52:00	77	Hyacinthaceae	Anna ?	Bulb		4		0
205	Plot09	2015-10-06	2015	24	15:35:00	16:52:00	77	Ledebouria sp	Lachenalia sp	Bulb	0.275		0.205	92.99	5	1
206	Plot09	2015-10-06	2015	24	15:35:00	16:52:00	77	Tritonia crocata	kalkoentjie	Corm	0.055	33	0.025	11.34	33
211	Plot09	2016-08-30	2016	24	10:35:00	12:03:00	88	Cyphia digitata	baroe	Tuber			0.34	154.22	4
213	Plot09	2016-08-30	2016	24	10:35:00	12:03:00	88	Eriospermum pubescens		Tuber			0.08	36.29	5
214	Plot09	2016-08-30	2016	24	10:35:00	12:03:00	88	Tritonia crocata	kalkoentjie	Corm	0.1	21	0.03	13.61	21
225	Plot01	2017-09-01	2017	24	14:30:00	14:50:00	20	Cyphia digitata	baroe	Tuber			0.04	18.14	1
226	Plot11	2017-09-01	2017	24	11:55:00	12:12:00	17	Conicosia pugioniformis	varkwortel	Root			0.13	58.97	4
227	Plot11	2017-09-01	2017	24	11:55:00	12:12:00	17	Pelargonium triste	kaneelbol	Tuber			0.07	31.75	5
229	Plot14	2017-09-01	2017	24	13:15:00	14:00:00	45	Babiana patula	bobbejaantjie	Corm			0.03	13.61	1
230	Plot14	2017-09-01	2017	24	13:15:00	14:00:00	45	Pelargonium lobatum	platblaar patat	Tuber			0.07	31.75	2
231	Plot14	2017-09-01	2017	24	13:15:00	14:00:00	45	Cyphia digitata	baroe	Tuber			0.05	22.68	2
233	Plot15	2017-09-01	2017	24	11:19:00	11:47:00	28	Pelargonium triste	kaneelbol	Tuber			0.25	113.4	3
234	Plot15	2017-09-01	2017	24	11:19:00	11:47:00	28	Pelargonium lobatum	platblaar patat	Tuber			0.07	31.75	4
237	Plot16	2017-09-01	2017	24	09:00:00	09:40:00	40	Chasmanthe aethiopica	pypie	Corm			0.1	45.36	12
238	Plot16	2017-09-01	2017	24	09:00:00	09:40:00	40	Kedrostis nana		Tuber			0.62	281.23	2
239	Plot16	2017-09-01	2017	24	09:00:00	09:40:00	40	Euphorbia burmannii					0.6	272.16	457
240	Plot16	2017-09-01	2017	24	09:00:00	09:40:00	40	Freesia alba	Hanekammetjie	Corm			0.04	18.14	3
242	Plot17	2017-09-01	2017	24	10:19:00	10:41:00	22	Kedrostis nana		Tuber			1.14	517.09	6
243	Plot19	2017-09-01	2017	24	15:55:00	16:25:00	30	Babiana patula	bobbejaantjie	Corm			0.03	13.61	2
245	Plot19	2017-09-01	2017	24	15:55:00	16:25:00	30	Unknown sp 7	Albuca?				0.04	18.14	2
246	Plot19	2017-09-01	2017	24	15:55:00	16:25:00	30	Unknown sp 2	Unknown piekenien				0.01	4.54	2
248	Plot02	2017-09-02	2017	24	14:00:00	15:02:00	62	Gladiolus teretifolius	Rooi pypie	Corm			0.1	45.36	6
251	Plot06	2017-09-02	2017	24	10:32:00	10:40:00	8	Chasmanthe aethiopica	pypie	Corm			0.06	27.22	5
253	Plot07	2017-09-02	2017	24	10:19:00	10:41:00	22	Satyrium carneum		Tuber			0.23	104.33	9
254	Plot07	2017-09-02	2017	24	10:19:00	10:41:00	22	Babiana ambigua	bobbejaantjie	Corm			0.12	54.43	21
256	Plot12	2017-09-02	2017	24	09:17:00	09:52:00	35	Pelargonium lobatum	platblaar patat	Tuber			0.13	58.97	2
257	Plot12	2017-09-02	2017	24	09:17:00	09:52:00	35	Babiana ambigua	bobbejaantjie	Corm			0.07	31.75	7
262	Plot20	2017-09-02	2017	24	13:02:00	13:26:00	24	Satyrium longicolle	Satyrium gloss	Tuber			0.03	13.61	3

## Sheet: 2.InPlot_NotHarvested
PlotNo	Location	Date	Year	Species	CommonName	PlantsNotHarvested_n	Comment on what was left behind		CODE	Constraint
Plot01	Tower Riethuyskraal farm	2015-09-03	2015	Babiana patula		0			H	P
Plot01	Tower Riethuyskraal farm	2015-09-03	2015	Cyphia digitata		0			H	P
Plot01	Tower Riethuyskraal farm	2016-09-01	2016	Babiana patula		0			H	P
Plot01	Tower Riethuyskraal farm	2017-09-01	2017	Babiana patula	bobbejaantjie	1	It breaks off when they dig for it		K	P
Plot01	Tower Riethuyskraal farm	2017-09-01	2017	Cyphia digitata		0
Plot02	Windsor	2015-09-07	2015	Satyrium longicolle		61	Forager: Die kleintjies (Satyriums) has got nothing on them.		A	P
Plot02	Windsor	2015-09-07	2015	Cyphia digitata		0	Forager: Die kleintjies (Satyriums) has got nothing on them.		H	P
Plot02	Windsor	2016-09-01	2016	Babiana patula		1	1 Babiana, 1 Takblaar, 61 Satyrium.		B	F
Plot02	Windsor	2016-09-01	2016	Eriospermum sp	takblaar	1	1 Babiana, 1 Takblaar, 61 Satyrium.		B	F
Plot02	Windsor	2016-09-01	2016	Satyrium longicolle		150			C	P
Plot02	Windsor	2016-09-01	2016	Cyphia digitata		0			H	P
Plot02	Windsor	2017-09-02	2017	Satyrium longicolle		200	Forager: Die kleintjies (Satyriums) has got nothing on them.		A, L	P
Plot02	Windsor	2017-09-02	2017	Babiana patula		12			L	P
Plot02	Windsor	2017-09-02	2017	Gladiolus teretifolius		2			L	P
Plot03	Gideon en Lorraine van Eeden, north of N2	2015-09-08	2015	Babiana patula		30	Babiana left behind.		C, D	P
Plot03	Gideon en Lorraine van Eeden, north of N2	2016-08-30	2016	Babiana patula		3	One missed, two in a thick clump.		B, E, K	P, F
Plot03	Gideon en Lorraine van Eeden, north of N2	2016-08-30	2016	Pelargonium repaceum		0	One missed, two in a thick clump.		H	P
Plot03	Gideon en Lorraine van Eeden, north of N2	2017-09-04	2017	Babiana patula		0			H	P
Plot04	Michael Gildenhuys, South of N2, close to Cooper	2015-09-09	2015	Freesia sp		2	In a bush clump might have missed them.		B	F
Plot04	Michael Gildenhuys, South of N2, close to Cooper	2016-09-02	2016	Freesia sp		1	Very small. They find bobbejaan bolle and go for that.		A	P
Plot04	Michael Gildenhuys, South of N2, close to Cooper	2017-08-31	2017	Freesia sp		0			H	P
Plot05	Michael Gildenhuys, South of N2, in the valley	2015-09-09	2015	Oxalis pes-caprae		200	After sometime they say it is not worth harvesting anymore since it breaks off when you harvest it in the thick grass clumps.		C	P
Plot05	Michael Gildenhuys, South of N2, in the valley	2016-09-02	2016	Oxalis pes-caprae		200	Lots of Oxalis but considerably less than last year. The foragers avoid the patch that was harvested intensely last year. After sometime they say it is not worth harvesting anymore since it breaks off when you harvest it in the thick grass clumps.		C	P
Plot05	Michael Gildenhuys, South of N2, in the valley	2017-08-31	2017	Oxalis pes-caprae		500	small plants, no food		A	P
Plot05	Michael Gildenhuys, South of N2, in the valley	2017-08-31	2017	Mesembryanthemum atenus		20	They only harvest the leaves, not the entire plant		G	F
Plot06	Jongensfontein private nature reserve	2015-10-05	2015	Chasmanthe aethiopica		2	In a thick thorny bush		E	P
Plot06	Jongensfontein private nature reserve	2016-09-03	2016	Chasmanthe aethiopica		1	Inspired to break open thick bushes because there are fewer edibles in the open, but still can not reach one in very dense, thorny bush clump.		E, F	P, F
Plot06	Jongensfontein private nature reserve	2017-09-02	2017	Chasmanthe aethiopica		1	In a thick thorny bush		E	P
Plot07	Jongensfontein private nature reserve, closer to beach	2015-10-05	2015	Satyrium carneum		1			B	F
Plot07	Jongensfontein private nature reserve, closer to beach	2016-09-03	2016	Albuca fragrans		0			H	P
Plot07	Jongensfontein private nature reserve, closer to beach	2016-09-03	2016	Babiana tubulosa		0			H	P
Plot07	Jongensfontein private nature reserve, closer to beach	2016-09-03	2016	Chasmanthe aethiopica		0			H	P
Plot07	Jongensfontein private nature reserve, closer to beach	2016-09-03	2016	Satyrium carneum		0			H	P
Plot07	Jongensfontein private nature reserve, closer to beach	2017-09-02	2017	Babiana ambigua		33			A	P
Plot07	Jongensfontein private nature reserve, closer to beach	2017-09-02	2017	Satyrium carneum		23			A	P
Plot07	Jongensfontein private nature reserve, closer to beach	2017-09-02	2017	Chasmanthe aethiopica		1			B	F
Plot08	Gideon van Eeden, further from N3	2015-10-06	2015	Babiana patula		11	11 babiana ambigua, 1 tight lachenalia, 50 hairy catcher, > 250 plat klein blaar, 5 kalkoentjie, 4 oranje pypie, 1 but with spots, 60 hairy satyrium,		B, C, G	P, F
Plot08	Gideon van Eeden, further from N5	2015-10-06	2015	Boophone guttata		50	11 babiana ambigua, 1 tight lachenalia, 50 hairy catcher, > 250 plat klein blaar, 5 kalkoentjie, 4 oranje pypie, 1 but with spots, 60 hairy satyrium,		B, C, G	P, F
Plot08	Gideon van Eeden, further from N4	2015-10-06	2015	Drimia elata		250	11 babiana ambigua, 1 tight lachenalia, 50 hairy catcher, > 250 plat klein blaar, 5 kalkoentjie, 4 oranje pypie, 1 but with spots, 60 hairy satyrium,		B, C, G	P, F
Plot08	Gideon van Eeden, further from N6	2015-10-06	2015	Eriospermum pubescens		60	11 babiana ambigua, 1 tight lachenalia, 50 hairy catcher, > 250 plat klein blaar, 5 kalkoentjie, 4 oranje pypie, 1 but with spots, 60 hairy satyrium,		B, C, G	P, F
Plot08	Gideon van Eeden, further from N7	2015-10-06	2015	Freesia alba		4	11 babiana ambigua, 1 tight lachenalia, 50 hairy catcher, > 250 plat klein blaar, 5 kalkoentjie, 4 oranje pypie, 1 but with spots, 60 hairy satyrium,		B, C, G	P, F
Plot08	Gideon van Eeden, further from N2	2015-10-06	2015	Tritonia crocata		5	11 babiana ambigua, 1 tight lachenalia, 50 hairy catcher, > 250 plat klein blaar, 5 kalkoentjie, 4 oranje pypie, 1 but with spots, 60 hairy satyrium,		B, C, G	P, F
Plot08	Gideon van Eeden, further from N2	2015-10-06	2015	Babiana patula		0	11 babiana ambigua, 1 tight lachenalia, 50 hairy catcher, > 250 plat klein blaar, 5 kalkoentjie, 4 oranje pypie, 1 but with spots, 60 hairy satyrium,		H	P
Plot08	Gideon van Eeden, further from N2	2015-10-06	2015	Pelargonium lobatum		0	11 babiana ambigua, 1 tight lachenalia, 50 hairy catcher, > 250 plat klein blaar, 5 kalkoentjie, 4 oranje pypie, 1 but with spots, 60 hairy satyrium,		H	P
Plot08	Gideon van Eeden, further from N2	2015-10-06	2015	Watsonia sp		0	11 babiana ambigua, 1 tight lachenalia, 50 hairy catcher, > 250 plat klein blaar, 5 kalkoentjie, 4 oranje pypie, 1 but with spots, 60 hairy satyrium,		H	P
Plot08	Gideon van Eeden, further from N8	2016-08-30	2016	Pelargonium lobatum		3	45 Freezias, 3 P. lobatums, 7 Krismisblom, 1 Babiana		A	P
Plot08	Gideon van Eeden, further from N8	2016-08-30	2016	Tritonia crocata		45	45 Freezias, 3 P. lobatums, 7 Krismisblom, 1 Babiana		A	P
Plot08	Gideon van Eeden, further from N8	2016-08-30	2016	Babiana patula		1	45 Freezias, 3 P. lobatums, 7 Krismisblom, 1 Babiana		B	F
Plot08	Gideon van Eeden	2016-08-30	2016	Pelargonium repaceum	Krismisblom	0	45 Freezias, 3 P. lobatums, 7 Krismisblom, 1 Babiana		N	F
Plot08	Gideon van Eeden	2016-08-30	2016	Unknown sp 3	Krismisblom	8	45 Freezias, 3 P. lobatums, 7 Krismisblom, 1 Babiana		N	F
Plot08	Gideon van Eeden, further from N2	2017-09-04	2017	Tritonia crocata		1			A	P
Plot08	Gideon van Eeden, further from N2	2017-09-04	2017	Pelargonium lobatum		0			H	P
Plot08	Gideon van Eeden, further from N2	2017-09-04	2017	Babiana patula		2			L	P
Plot08	Gideon van Eeden, further from N2	2017-09-04	2017	Boophone guttata		50			N	F
Plot08	Gideon van Eeden, further from N2	2017-09-04	2017	Drimia elata		250			N	F
Plot09	Infinity farm	2015-10-06	2015	Tritonia crocata		17	One cyphia broke off so they left it behind. 17 kalkoentjies, 5 new ones, 1 cyphia (broke off left some behind) 10 big leaf satyrium.		A, B, C	P, F
Plot09	Infinity farm	2015-10-06	2015	Eriospermum pubescens		10	One cyphia broke off so they left it behind. 17 kalkoentjies, 5 new ones, 1 cyphia (broke off left some behind) 10 big leaf satyrium.		A, N	P
Plot09	Infinity farm	2015-10-06	2015	Cyphia digitata		1	One cyphia broke off so they left it behind. 17 kalkoentjies, 5 new ones, 1 cyphia (broke off left some behind) 10 big leaf satyrium.		K	P
Plot09	Infinity farm	2016-08-30	2016	Tritonia crocata		101	101 Freesia and 38 Satyriums.		C	F
Plot09	Infinity farm	2016-08-30	2016	Eriospermum pubescens		38	101 Freesia and 38 Satyriums.		C, N	P
Plot09	Infinity farm	2016-08-30	2016	Cyphia digitata		0	101 Freesia and 38 Satyriums.		H	P
Plot09	Infinity farm	2017-09-04	2017	Tritonia crocata		12			A	P
Plot09	Infinity farm	2017-09-04	2017	Babiana patula		0			H	P
Plot09	Infinity farm	2017-09-04	2017	Cyphia digitata		0			H	P
Plot10	Rein's Nature Reserve	2015-10-09	2015	Watsonia fourcadii		1	missed it. Under the canopy of a burnt Protea.		B	F
Plot10	Rein's Nature Reserve	2016-09-04	2016	Watsonia fourcadii		0			H	P
Plot10	Rein's Nature Reserve	2017-08-31	2017	Watsonia fourcadii		0			H	P
Plot11	Sewarage works, new road	2015-11-06	2015	Conicosia pugioniformis		0			H	P
Plot11	Sewarage works, new road	2015-11-06	2015	Pelargonium triste		0			H	P
Plot11	Sewarage works, new road	2016-09-01	2016	Conicosia pugioniformis		0			H	P
Plot11	Sewarage works, new road	2016-09-01	2016	Pelargonium triste		0			H	P
Plot11	Sewarage works, new road	2017-09-01	2017	Conicosia pugioniformis		18			A	P
Plot11	Sewarage works, new road	2017-09-01	2017	Pelargonium triste		0			H	P
Plot12	Attie Nel -milkwood tree	2015-11-06	2015	Pelargonium lobatum		0			H	P
Plot12	Attie Nel -milkwood tree	2016-09-01	2016	Chasmanthe aethiopica		0			H	P
Plot12	Attie Nel -milkwood tree	2016-09-01	2016	Pelargonium lobatum		0			H	P
Plot12	Attie Nel -milkwood tree	2016-09-01	2016	Pelargonium lobatum		0			H	P
Plot12	Attie Nel -milkwood tree	2017-09-02	2017	Babiana ambigua		0			H	P
Plot13	Palmiet spot - just below N2 on the Gou Kou river	2015-11-12	2015	Prionium serratum		20	on the edge, some small.		A, B	P, F
Plot13	Palmiet spot - just below N2 on the Gou Kou river	2016-10-19	2016	Prionium serratum		0			H	P
Plot13	Palmiet spot - just below N2 on the Gou Kou river	2017-09-05	2017	Prionium serratum					O	P
Plot14	Above tower, PB Reserve	2015-08-25	2015	Babiana patula		0			H	P
Plot14	Above tower, PB Reserve	2015-08-25	2015	Pelargonium lobatum		0			H	P
Plot14	Above tower, PB Reserve	2015-08-25	2015	Wachendorfia speciflora		0			H	P
Plot14	Above tower, PB Reserve	2016-09-01	2016	Babiana patula		0			H	P
Plot14	Above tower, PB Reserve	2016-09-01	2016	Chasmanthe aethiopica		0			H	P
Plot14	Above tower, PB Reserve	2016-09-01	2016	Pelargonium lobatum		0			H	P
Plot14	Above tower, PB Reserve	2017-09-01	2017	Cyphia digitata		0			H	P
Plot14	Above tower, PB Reserve	2017-09-01	2017	Pelargonium lobatum		0			H	P
Plot15	Still bay, above sewerage works	2015-08-25	2015	Pelargonium triste		7			A	P
Plot15	Still bay, above sewerage works	2015-08-25	2015	Babiana ambigua		0			H	P
Plot15	Still bay, above sewerage works	2015-08-25	2015	Pelargonium lobatum		0			H	P
Plot15	Still bay, above sewerage works	2016-09-01	2016	Babiana ambigua		1	Missed 1 Babiana. Foragers were so surprised to see it.		B	F
Plot15	Still bay, above sewerage works	2016-09-01	2016	Pelargonium lobatum		1	Missed 1 Babiana. Foragers were so surprised to see it.		H	P
Plot15	Still bay, above sewerage works	2016-09-01	2016	Pelargonium triste		1	Missed 1 Babiana. Foragers were so surprised to see it.		H	P
Plot15	Still bay, above sewerage works	2017-09-01	2017	Pelargonium lobatum		0			H	P
Plot15	Still bay, above sewerage works	2017-09-01	2017	Pelargonium triste		0			H	P
Plot16	Jongensfontein strand (“kak”)	2015-08-26	2015	Chasmanthe aethiopica		26			B, E, I	P, F
Plot16	Jongensfontein strand (“kak”)	2015-08-26	2015	Pelargonium triste		0			B, E, I	P, F
Plot16	Jongensfontein strand (“kak”)	2016-09-01	2016	Chasmanthe aethiopica		40	Very small with no food on them, or in thorny bushes, can't reach them.		A, E	P
Plot16	Jongensfontein strand (“kak”)	2017-09-01	2017	Chasmanthe aethiopica		2			A, E	P
Plot16	Jongensfontein strand (“kak”)	2017-09-01	2017	Freesia alba		0			H	P
Plot16	Jongensfontein strand (“kak”)	2017-09-01	2017	Kedrostis nana		0			H	P
Plot17	End of road N of Jongensfontein beach	2015-08-26	2015	Kedrostis nana		0			H	P
Plot17	End of road N of Jongensfontein beach	2016-09-03	2016	Kedrostis nana		0			H	P
Plot17	End of road N of Jongensfontein beach	2017-09-01	2017	Kedrostis nana		0			H	P
Plot18	Danie du Plessis, Buysplaas	2015-08-27	2015	Ferraria crispa		1			B	F
Plot18	Danie du Plessis, Buysplaas	2016-08-31	2016	Ferraria crispa		5	Some vines could not be traced down to dig out the Cyphia. 5 Ferraria crispas were not dug out because they were too small.		A	P
Plot18	Danie du Plessis, Buysplaas	2016-08-31	2016	Cyphia digitata		2	Some vines could not be traced down to dig out the Cyphia. 5 Ferraria crispas were not dug out because they were too small.		J, K	P
Plot18	Danie du Plessis, Buysplaas	2017-09-04	2017	Ferraria crispa		1			A	P
Plot18	Danie du Plessis, Buysplaas	2017-09-04	2017	Cyphia digitata		3			B	F
Plot19	Langkloof hoogte road	2015-09-02	2015	Babiana patula		0			H	P
Plot19	Langkloof hoogte road	2016-09-04	2016	Babiana patula		0			H	P
Plot19	Langkloof hoogte road	2017-09-01	2017	Babiana patula		0			H	P
Plot20	Dave Bongers' farm	2015-09-03	2015	Babiana patula		0	Satyrium (big) spp left behind.		G	F
Plot20	Dave Bongers' farm	2015-09-03	2015	Pelargonium repaceum		0	Satyrium (big) spp left behind.		G	F
Plot20	Dave Bongers' farm	2015-09-03	2015	Satyrium longicolle		4	Satyrium (big) spp left behind.		G	F
Plot20	Dave Bongers' farm	2016-09-03	2016	Babiana patula		3	Some broke off during digging them up		K	P
Plot20	Dave Bongers' farm	2017-09-02	2017	Satyrium longicolle		0	Leave nothing behind		H	P
Plot 20	Dave Bongers' farm	2016-09-03	2016	Satyrium longicolle		0	Satyrium (big) spp left behind.
Plot 20	Dave Bongers' farm	2017-09-02	2017	Gladiolus teretifolius		0	Leave nothing behind

## Sheet: 3.PlotInfo
Order	PlotNo	Location	Veg.type	WP	Age of fynbos site at the time of first harvest (2015)	Aspect	Comments2015	Comments2016	Dominant species present	No of plants not dug up	Comment on what was left behind	Soil Compaction measurement (1)	Soil Compaction measurement (2)	Soil Compaction measurement (3)	Soil Compaction measurement (4)	GPS CO-ORDS	Lat	Long
1	Plot01	Tower Riethuyskraal farm	Limestone fynbos	292, 293, 294, 295	8 yrs	West			Protea obtusifolia, Leucadendron meridianum, Agathosma sp	0		3.5	6.5	6	3.5	292	34 17 04.0	021 23 05.0
99	Plot02	Windsor	Renosterveld	296, 297, 298, 299	2017: < 1 year	South	Cyphia: “Dit le vlak, bo-op die grond. Dis soos klein aartappeltjies” Ave size much smaller than in limestone fynbos. Farmer: When you see this moss on the ground, then it doesn't make food anymore. Even your harvested “kweek” dies. Soil very wet, easy to dig. Cyphias flowering at same time as Agathosma and blends in with these flowers.		Elytropappus rhinocerotis, Agathosma sp	61	Forager: Die kleintjies (Satyriums) has got nothing on them.					296	34 13 38.2	021 17 50.8
125	Plot03	Gideon en Lorraine van Eeden, north of N2	Renosterveld	300,301, 302, 303		Flat (North)	Susan pulls a Babiana straight out the ground without digging. Farmer: We had lots of rain yesterday, soil very soft. Taught as a child should snap flowers otherwise you pull the whole plant out. 20 mm rain day before.		Elytropappus rhinocerotis	30	Babiana left behind.	2.5	4.5	3.5	4	301	34 05 19.8	021 26 22.5
132	Plot04	Michael Gildenhuys, South of N2, close to Cooper	Renosterveld	310, 311, 312, 313		Flat ridge top			Searsia sp, Elytropappus rhinocerotis	2	In a bush clump might have missed them.	0	0.5	0.5	4.5	310	34 14 13.9	021 48 46.6
140	Plot05	Michael Gildenhuys, South of N2, in the valley	Alluvial vegetation	314, 315, 316, 317		Flat	Foragers:”Ons gaan nooit klaar kry nie.” Did not finish harvesting the whole plot.Cleared approximately 4 by 3 m. Left Oxalis behind growing in thick grass clumps. Also left behind approximately 40 foraged plants that they had harvested. The Oxalis does not have the same root structure as the one growing close to N2 (near Riversdale). Plot chosen by foragers, very dense stand.		Oxalis pes-caprae	6 by 7m	(Did not finish with plot).	20	20	9	14.5	314	34 13 48.6	021 49 17.1
152	Plot06	Jongensfontein private nature reserve	Strandveld	322,323, 324, 325		South			Searsia lucida, Sideroxylon inerme, Struthiola sp, Ruschia sp, Osteospermum monilifera, Osyris compressa, Restio sp	2	In a thick thorny bush	13	15	12	15	323	34 24 48.6	021 22 24.7
158	Plot07	Jongensfontein private nature reserve, closer to beach	Strandveld	326, 327		South	Easy to dig.		Sideroxylon inerme, Struthiola sp, Ruschia sp, Pterocelastrus tricuspidatus	1		13	15	12	15	326	34 24 46.3	021 22 36.6
170	Plot08	Gideon van Eeden	Renosterveld	330, 331		North	High diversity. Soil hard.		Eriocephalus, Ruschia sp, Indigofera sp, Phylica sp	390	11 babiana ambigua, 1 tight lachenalia, 50 hairy catcher, > 250 plat klein blaar, 5 kalkoentjie, 4 oranje pypie, 1 but with spots, 60 hairy satyrium,	0	2	0	4	330	34 05 09.2	021 26 32.4
199	Plot09	Infinity farm	Renosterveld	333		South	Cyphia: "Hy is taai. Ek wil hom he. Nou's ek moeg. Vat al jou krag. Ek kyk die renosterbos. Hulle (cyphia) is lief vir die bosse. Klippe en wortels hou hom vas.		Eriocephalus sp, Searsia sp, Indigofera sp	33	One cyphia broke off so they left it behind. 17 kalkoentjies, 5 new ones, 1 cyphia (broke off left some behind) 10 big leaf satyrium.	3	0	0.3	1.5	333	34 07 28.2	021 23 28.0
8	Plot10	Rein's Nature Reserve	Sand fynbos	343, 344	~ 1 year	South	Watsonia foucardii: "Hulle het hom nou gebrand nou het die nuwes tussen die dooies opgekom. Nou grawe jy die nuwes moelik uit. Jy't eintlik 'n tuin vurk nodig dan gaan hulle net so uitkom. Die goed maak my nou moeg hulle wil nie uitkom nie. Hier gaan ons nooit klaar kom nie - te veel."		Leucadendron sp, Watsonia foucardii, Erica sp	1	missed it. Under the canopy of a burnt Protea.	18	17	20	20	343	34 21 46.2	021 44 53.0
14	Plot11	Sewarage works, new road	Strandveld	349, 350, 351, 352		South	Disturbed site. Dominated by grass. Plot lies over a road. Pelargonium leaves are dying.		Grass species	0		10	16	22	20	349	34 23 32.4	021 24 39.9
23	Plot12	Attie Nel -milkwood tree	Strandveld	352, 357					Osteospermum monilifera, Sideroxylon inerme, Carissa bispinosa, Ruschia glauca, Helichrysum sp	0		8	12	18	20	352	34 23 37.2	021 24 31.9
36	Plot13	Palmiet spot - just below N2 on the Gou Kou river	Riparian	369			Foragers had never harvested palmiet before. Struggled to snap off stems at first, but once they got the hang off it, it started going quickly. Trick is to peel back some of the outer leaves. Almost could not reach patch because the river levels are higher. 4.5 by 4.5 by 4.0 by 3.5 m area		Prionium serratum	20	on the edge, some small.					369	34 08 55.3	021 16 42.8
43	Plot14	Above tower, PB Reserve	Limestone fynbos	258	~ 15 yrs		Both foragers start in the same area of the plot where there is a hotspot of P. lobatum before moving onto other species such as Babiana (which is higher effort for less return).		Protea sp, Leucadendron sp, Leucospermum sp							258	34 21 59.0	021 25 17.0
57	Plot15	Still bay, above sewerage works	Strandveld	262, 263		South	Started harvesting P. triste but foragers stopped foraging it after they only found babies. In the process of foraging they dug up bobbejaan balle but dit not collect it (tubers had nearly no weight). Did not harvest Diospyros because the fruit was not ripe.		Diospyros dicrophylla, Sideroxylon inerme	7? & 1	Missed 1 Babiana. Foragers were so surprised to see it.					262	34 23 37.1	021 24 35.8
67	Plot16	Jongensfontein strand (“kak”)	Strandveld	265, 266, 267, 268		South	C. aethiopica easier to forage in bout – easier to dig out (soil is more sandy closer to the beach).		Searsia glauca, Carissa bispinosa, Phylica sp, Ruschia sp	27						265	34 25 07.1	021 21 05.6
76	Plot17	End of road N of Jongensfontein beach	Strandveld	271, 272, 273, 274		South	Found new sp at end of bout 3. Mark out a plot to capture sp Sus bored.		Sideroxylon inerme	0						271	34 25 10.9	021 22 22.2
83	Plot18	Danie du Plessis, Buysplaas	Albany thicket	276, 277, 278, 279		Flat	Refused digging stones. Not all individual plants. Many bulbs on one plant.		Aloe ferox, Polygala sp, Euphorbia sp, Acacia karroo, Drosanthemum sp, Asparagus sp	1	Was dug up but got left behind after foraging.					276	34 05 57.7	021 43 21.4
92	Plot19	Langkloof hoogte road	Limestone fynbos	281, 282, 283, 284	2015-2016: ~ 25 yrs, 2017: < 1 yrs	South	“Hy't so diep gesit, my hande is pikswart. Nee wat, daar is niks hier nie.” Bobbejaantjie under a stone, very difficult to get to. Lots of moribund Proteaceae. Very difficult to walk through.		Protea obtusifolia, Leucadendron meridianum, Muraltia sp	0						281	34 18 16.5	021 23 16.7
112	Plot20	Dave Bongers' farm	Renosterveld	287, 288, 289, 290		NW	Started digging for two different Satyrium sp and mixed them up. Lots of rain, soil is very soft.		Elytropappus rhinocerotis, Agathosma sp	4	Satyrium (big) sp left behind.	2.5				288	34 16 05.6	021 18 02.1

## Sheet: 4.Codes
Order	PlotNo	Location	Date	Species	Common name	Part collected	Edible.weight.count	Processing time (mins)	No of plants not dug up	Comment on what was left behind	CODE	Constraint
1	Plot07	Jongensfontein private nature reserve, closer to beach	2016-09-03	Albuca fragrans			0		0		H	P
2	Plot07	Jongensfontein private nature reserve, closer to beach	2017-09-02	Babiana ambigua		corms	33		33		A	P
3	Plot12	Attie Nel -milkwood tree	2017-09-02	Babiana ambigua			0		0		H	P
4	Plot15	Still bay, above sewerage works	2015-08-25	Babiana ambigua		tubers	7		0		H	P
5	Plot15	Still bay, above sewerage works	2016-09-01	Babiana ambigua		corms	1		1	Missed 1 Babiana. Foragers were so surprised to see it.	B	F
6	Plot01	Tower Riethuyskraal farm	2015-09-03	Babiana patula			0		0		H	P
7	Plot01	Tower Riethuyskraal farm	2016-09-01	Babiana patula		corms	0		0		H	P
8	Plot01	Tower Riethuyskraal farm	2017-09-01	Babiana patula	bobbejaantjie		1		1	It breaks off when they dig for it	K	P
9	Plot02	Windsor	2016-09-01	Babiana patula		corms	1		1	1 Babiana, 1 Takblaar, 61 Satyrium.	B	F
10	Plot02	Windsor	2017-09-02	Babiana patula		corms	12		12		L	P
11	Plot03	Gideon en Lorraine van Eeden, north of N2	2015-09-08	Babiana patula			30		30	Babiana left behind.	C	P
12	Plot03	Gideon en Lorraine van Eeden, north of N2	2015-09-08	Babiana patula			30		30	Babiana left behind.	D	P
13	Plot03	Gideon en Lorraine van Eeden, north of N2	2016-08-30	Babiana patula		corms	3		3	One missed, two in a thick clump.	B	P, F
14	Plot03	Gideon en Lorraine van Eeden, north of N2	2016-08-30	Babiana patula		corms	3		3	One missed, two in a thick clump.	E	P, F
15	Plot03	Gideon en Lorraine van Eeden, north of N2	2016-08-30	Babiana patula		corms	3		3	One missed, two in a thick clump.	K	P, F
16	Plot03	Gideon en Lorraine van Eeden, north of N2	2017-09-04	Babiana patula			0		0		H	P
17	Plot08	Gideon van Eeden, further from N3	2015-10-06	Babiana patula		corms	11		11	11 babiana ambigua, 1 tight lachenalia, 50 hairy catcher, > 250 plat klein blaar, 5 kalkoentjie, 4 oranje pypie, 1 but with spots, 60 hairy satyrium,	B	P, F
18	Plot08	Gideon van Eeden, further from N3	2015-10-06	Babiana patula		corms	11		11	11 babiana ambigua, 1 tight lachenalia, 50 hairy catcher, > 250 plat klein blaar, 5 kalkoentjie, 4 oranje pypie, 1 but with spots, 60 hairy satyrium,	C	P, F
19	Plot08	Gideon van Eeden, further from N3	2015-10-06	Babiana patula		corms	11		11	11 babiana ambigua, 1 tight lachenalia, 50 hairy catcher, > 250 plat klein blaar, 5 kalkoentjie, 4 oranje pypie, 1 but with spots, 60 hairy satyrium,	G	P, F
20	Plot08	Gideon van Eeden, further from N2	2015-10-06	Babiana patula		corms	5		0	11 babiana ambigua, 1 tight lachenalia, 50 hairy catcher, > 250 plat klein blaar, 5 kalkoentjie, 4 oranje pypie, 1 but with spots, 60 hairy satyrium,	H	P
21	Plot08	Gideon van Eeden, further from N8	2016-08-30	Babiana patula		corms	1		1	45 Freezias, 3 P. lobatums, 7 Krismisblom, 1 Babiana	B	F
22	Plot08	Gideon van Eeden, further from N2	2017-09-04	Babiana patula			2		2		L	P
23	Plot09	Infinity farm	2017-09-04	Babiana patula			12		0		H	P
24	Plot14	Above tower, PB Reserve	2015-08-25	Babiana patula			0		0		H	P
25	Plot14	Above tower, PB Reserve	2016-09-01	Babiana patula			0		0		H	P
26	Plot19	Langkloof hoogte road	2015-09-02	Babiana patula			0		0		H	P
27	Plot19	Langkloof hoogte road	2016-09-04	Babiana patula			0		0		H	P
28	Plot19	Langkloof hoogte road	2017-09-01	Babiana patula			0		0		H	P
29	Plot20	Dave Bongers' farm	2015-09-03	Babiana patula		tubers	4		0	Satyrium (big) spp left behind.	G	F
30	Plot20	Dave Bongers' farm	2016-09-03	Babiana patula		corms	3		3	Some broke off during digging them up	K	P
31	Plot07	Jongensfontein private nature reserve, closer to beach	2016-09-03	Babiana tubulosa			0		0		H	P
32	Plot08	Gideon van Eeden, further from N5	2015-10-06	Boophone guttata		bulbs	50		50	11 babiana ambigua, 1 tight lachenalia, 50 hairy catcher, > 250 plat klein blaar, 5 kalkoentjie, 4 oranje pypie, 1 but with spots, 60 hairy satyrium,	B	P, F
33	Plot08	Gideon van Eeden, further from N5	2015-10-06	Boophone guttata		bulbs	50		50	11 babiana ambigua, 1 tight lachenalia, 50 hairy catcher, > 250 plat klein blaar, 5 kalkoentjie, 4 oranje pypie, 1 but with spots, 60 hairy satyrium,	C	P, F
34	Plot08	Gideon van Eeden, further from N5	2015-10-06	Boophone guttata		bulbs	50		50	11 babiana ambigua, 1 tight lachenalia, 50 hairy catcher, > 250 plat klein blaar, 5 kalkoentjie, 4 oranje pypie, 1 but with spots, 60 hairy satyrium,	G	P, F
35	Plot08	Gideon van Eeden, further from N2	2017-09-04	Boophone guttata			50		50		N	F
36	Plot06	Jongensfontein private nature reserve	2015-10-05	Chasmanthe aethiopica		corms	2		2	In a thick thorny bush	E	P
37	Plot06	Jongensfontein private nature reserve	2016-09-03	Chasmanthe aethiopica		corms	1		1	Inspired to break open thick bushes because there are fewer edibles in the open, but still can not reach one in very dense, thorny bush clump.	E	P, F
38	Plot06	Jongensfontein private nature reserve	2016-09-03	Chasmanthe aethiopica		corms	1		1	Inspired to break open thick bushes because there are fewer edibles in the open, but still can not reach one in very dense, thorny bush clump.	F	P, F
39	Plot06	Jongensfontein private nature reserve	2017-09-02	Chasmanthe aethiopica		corms	1		1	In a thick thorny bush	E	P
40	Plot07	Jongensfontein private nature reserve, closer to beach	2016-09-03	Chasmanthe aethiopica			0		0		H	P
41	Plot07	Jongensfontein private nature reserve, closer to beach	2017-09-02	Chasmanthe aethiopica		corms	1		1		B	F
42	Plot12	Attie Nel -milkwood tree	2016-09-01	Chasmanthe aethiopica			0		0		H	P
43	Plot14	Above tower, PB Reserve	2016-09-01	Chasmanthe aethiopica			0		0		H	P
44	Plot16	Jongensfontein strand (“kak”)	2015-08-26	Chasmanthe aethiopica		corms	26		26		B	P, F
45	Plot16	Jongensfontein strand (“kak”)	2015-08-26	Chasmanthe aethiopica		corms	26		26		E	P, F
46	Plot16	Jongensfontein strand (“kak”)	2015-08-26	Chasmanthe aethiopica		corms	26		26		I	P, F
47	Plot16	Jongensfontein strand (“kak”)	2016-09-01	Chasmanthe aethiopica		corms	40		40	Very small with no food on them, or in thorny bushes, can't reach them.	A	P
48	Plot16	Jongensfontein strand (“kak”)	2016-09-01	Chasmanthe aethiopica		corms	40		40	Very small with no food on them, or in thorny bushes, can't reach them.	E	P
49	Plot16	Jongensfontein strand (“kak”)	2017-09-01	Chasmanthe aethiopica		corms	2		2		A	P
50	Plot16	Jongensfontein strand (“kak”)	2017-09-01	Chasmanthe aethiopica		corms	2		2		E	P
51	Plot11	Sewarage works, new road	2015-11-06	Conicosia pugioniformis			0		0		H	P
52	Plot11	Sewarage works, new road	2016-09-01	Conicosia pugioniformis			0		0		H	P
53	Plot11	Sewarage works, new road	2017-09-01	Conicosia pugioniformis			18		18		A	P
54	Plot01	Tower Riethuyskraal farm	2015-09-03	Cyphia digitata			0		0		H	P
55	Plot01	Tower Riethuyskraal farm	2017-09-01	Cyphia digitata					0
56	Plot02	Windsor	2015-09-07	Cyphia digitata		tubers	61		0	Forager: Die kleintjies (Satyriums) has got nothing on them.	H	P
57	Plot02	Windsor	2016-09-01	Cyphia digitata		tubers	150		0		H	P
58	Plot09	Infinity farm	2015-10-06	Cyphia digitata		tubers	1		1	One cyphia broke off so they left it behind. 17 kalkoentjies, 5 new ones, 1 cyphia (broke off left some behind) 10 big leaf satyrium.	K	P
59	Plot09	Infinity farm	2016-08-30	Cyphia digitata		corms	101		0	101 Freesia and 38 Satyriums.	H	P
60	Plot09	Infinity farm	2017-09-04	Cyphia digitata			12		0		H	P
61	Plot14	Above tower, PB Reserve	2017-09-01	Cyphia digitata			0		0		H	P
62	Plot18	Danie du Plessis, Buysplaas	2016-08-31	Cyphia digitata		tubers	2		2	Some vines could not be traced down to dig out the Cyphia. 5 Ferraria crispas were not dug out because they were too small.	J	P
63	Plot18	Danie du Plessis, Buysplaas	2016-08-31	Cyphia digitata		tubers	2		2	Some vines could not be traced down to dig out the Cyphia. 5 Ferraria crispas were not dug out because they were too small.	K	P
64	Plot18	Danie du Plessis, Buysplaas	2017-09-04	Cyphia digitata			3		3		B	F
65	Plot08	Gideon van Eeden, further from N4	2015-10-06	Drimia elata		tubers	250		250	11 babiana ambigua, 1 tight lachenalia, 50 hairy catcher, > 250 plat klein blaar, 5 kalkoentjie, 4 oranje pypie, 1 but with spots, 60 hairy satyrium,	B	P, F
66	Plot08	Gideon van Eeden, further from N4	2015-10-06	Drimia elata		tubers	250		250	11 babiana ambigua, 1 tight lachenalia, 50 hairy catcher, > 250 plat klein blaar, 5 kalkoentjie, 4 oranje pypie, 1 but with spots, 60 hairy satyrium,	C	P, F
67	Plot08	Gideon van Eeden, further from N4	2015-10-06	Drimia elata		tubers	250		250	11 babiana ambigua, 1 tight lachenalia, 50 hairy catcher, > 250 plat klein blaar, 5 kalkoentjie, 4 oranje pypie, 1 but with spots, 60 hairy satyrium,	G	P, F
68	Plot08	Gideon van Eeden, further from N2	2017-09-04	Drimia elata			250		250		N	F
69	Plot08	Gideon van Eeden, further from N6	2015-10-06	Eriospermum pubescens		bulbs	60		60	11 babiana ambigua, 1 tight lachenalia, 50 hairy catcher, > 250 plat klein blaar, 5 kalkoentjie, 4 oranje pypie, 1 but with spots, 60 hairy satyrium,	B	P, F
70	Plot08	Gideon van Eeden, further from N6	2015-10-06	Eriospermum pubescens		bulbs	60		60	11 babiana ambigua, 1 tight lachenalia, 50 hairy catcher, > 250 plat klein blaar, 5 kalkoentjie, 4 oranje pypie, 1 but with spots, 60 hairy satyrium,	C	P, F
71	Plot08	Gideon van Eeden, further from N6	2015-10-06	Eriospermum pubescens		bulbs	60		60	11 babiana ambigua, 1 tight lachenalia, 50 hairy catcher, > 250 plat klein blaar, 5 kalkoentjie, 4 oranje pypie, 1 but with spots, 60 hairy satyrium,	G	P, F
72	Plot09	Infinity farm	2015-10-06	Eriospermum pubescens			10		10	One cyphia broke off so they left it behind. 17 kalkoentjies, 5 new ones, 1 cyphia (broke off left some behind) 10 big leaf satyrium.	A	P
73	Plot09	Infinity farm	2015-10-06	Eriospermum pubescens			10		10	One cyphia broke off so they left it behind. 17 kalkoentjies, 5 new ones, 1 cyphia (broke off left some behind) 10 big leaf satyrium.	N	P
74	Plot09	Infinity farm	2016-08-30	Eriospermum pubescens		tubers	38		38	101 Freesia and 38 Satyriums.	C	P
75	Plot09	Infinity farm	2016-08-30	Eriospermum pubescens		tubers	38		38	101 Freesia and 38 Satyriums.	N	P
76	Plot02	Windsor	2016-09-01	Eriospermum sp	takblaar	tubers	1		1	1 Babiana, 1 Takblaar, 61 Satyrium.	B	F
77	Plot18	Danie du Plessis, Buysplaas	2015-08-27	Ferraria crispa			1		1		B	F
78	Plot18	Danie du Plessis, Buysplaas	2016-08-31	Ferraria crispa		corms	5		5	Some vines could not be traced down to dig out the Cyphia. 5 Ferraria crispas were not dug out because they were too small.	A	P
79	Plot18	Danie du Plessis, Buysplaas	2017-09-04	Ferraria crispa			1		1		A	P
80	Plot08	Gideon van Eeden, further from N7	2015-10-06	Freesia alba		corms	4		4	11 babiana ambigua, 1 tight lachenalia, 50 hairy catcher, > 250 plat klein blaar, 5 kalkoentjie, 4 oranje pypie, 1 but with spots, 60 hairy satyrium,	B	P, F
81	Plot08	Gideon van Eeden, further from N7	2015-10-06	Freesia alba		corms	4		4	11 babiana ambigua, 1 tight lachenalia, 50 hairy catcher, > 250 plat klein blaar, 5 kalkoentjie, 4 oranje pypie, 1 but with spots, 60 hairy satyrium,	C	P, F
82	Plot08	Gideon van Eeden, further from N7	2015-10-06	Freesia alba		corms	4		4	11 babiana ambigua, 1 tight lachenalia, 50 hairy catcher, > 250 plat klein blaar, 5 kalkoentjie, 4 oranje pypie, 1 but with spots, 60 hairy satyrium,	G	P, F
83	Plot16	Jongensfontein strand (“kak”)	2017-09-01	Freesia alba		corms	2		0		H	P
84	Plot04	Michael Gildenhuys, South of N2, close to Cooper	2015-09-09	Freesia sp		corms	2		2	In a bush clump might have missed them.	B	F
85	Plot04	Michael Gildenhuys, South of N2, close to Cooper	2016-09-02	Freesia sp		corms	1		1	Very small. They find bobbejaan bolle and go for that.	A	P
86	Plot04	Michael Gildenhuys, South of N2, close to Cooper	2017-08-31	Freesia sp			0		0		H	P
87	Plot02	Windsor	2017-09-02	Gladiolus teretifolius		tubers	2		2		L	P
88		Dave Bongers' farm	2017-09-02	Gladiolus teretifolius			0		0	Leave nothing behind
89	Plot16	Jongensfontein strand (“kak”)	2017-09-01	Kedrostis nana		corms	2		0		H	P
90	Plot17	End of road N of Jongensfontein beach	2015-08-26	Kedrostis nana			0		0		H	P
91	Plot17	End of road N of Jongensfontein beach	2016-09-03	Kedrostis nana			0		0		H	P
92	Plot17	End of road N of Jongensfontein beach	2017-09-01	Kedrostis nana			0		0		H	P
94	Plot05	Michael Gildenhuys, South of N2, in the valley	2015-09-09	Oxalis pes-caprae		plants	400		200	After sometime they say it is not worth harvesting anymore since it breaks off when you harvest it in the thick grass clumps.	C	P
97	Plot08	Gideon van Eeden, further from N2	2015-10-06	Pelargonium lobatum		corms	5		0	11 babiana ambigua, 1 tight lachenalia, 50 hairy catcher, > 250 plat klein blaar, 5 kalkoentjie, 4 oranje pypie, 1 but with spots, 60 hairy satyrium,	H	P
98	Plot08	Gideon van Eeden, further from N8	2016-08-30	Pelargonium lobatum		tubers	3		3	45 Freezias, 3 P. lobatums, 7 Krismisblom, 1 Babiana	A	P
99	Plot08	Gideon van Eeden, further from N2	2017-09-04	Pelargonium lobatum			250		0		H	P
100	Plot12	Attie Nel -milkwood tree	2015-11-06	Pelargonium lobatum			0		0		H	P
101	Plot12	Attie Nel -milkwood tree	2016-09-01	Pelargonium lobatum			0		0		H	P
102	Plot12	Attie Nel -milkwood tree	2016-09-01	Pelargonium lobatum			0		0		H	P
103	Plot14	Above tower, PB Reserve	2015-08-25	Pelargonium lobatum			0		0		H	P
104	Plot14	Above tower, PB Reserve	2016-09-01	Pelargonium lobatum			0		0		H	P
105	Plot14	Above tower, PB Reserve	2017-09-01	Pelargonium lobatum			0		0		H	P
106	Plot15	Still bay, above sewerage works	2015-08-25	Pelargonium lobatum		tubers	7		0		H	P
107	Plot15	Still bay, above sewerage works	2016-09-01	Pelargonium lobatum		corms	1		1	Missed 1 Babiana. Foragers were so surprised to see it.	H	P
108	Plot15	Still bay, above sewerage works	2017-09-01	Pelargonium lobatum			0		0		H	P
109	Plot03	Gideon en Lorraine van Eeden, north of N2	2016-08-30	Pelargonium repaceum		corms	3		0	One missed, two in a thick clump.	H	P
110	Plot08	Gideon van Eeden	2016-08-30	Pelargonium repaceum	Krismisblom		8		0	45 Freezias, 3 P. lobatums, 7 Krismisblom, 1 Babiana	N	F
111	Plot20	Dave Bongers' farm	2015-09-03	Pelargonium repaceum		tubers	4		0	Satyrium (big) spp left behind.	G	F
112	Plot11	Sewarage works, new road	2017-09-01	Pelargonium triste			18		0		H	P
113	Plot11	Sewarage works, new road	2016-09-01	Pelargonium triste			18		0		H	P
114	Plot11	Sewarage works, new road	2015-11-06	Pelargonium triste			18		0		H	P
115	Plot15	Still bay, above sewerage works	2015-08-25	Pelargonium triste		tubers	7		7		A	P
116	Plot15	Still bay, above sewerage works	2016-09-01	Pelargonium triste		corms	1		1	Missed 1 Babiana. Foragers were so surprised to see it.	H	P
117	Plot15	Still bay, above sewerage works	2017-09-01	Pelargonium triste			0		0		H	P
118	Plot16	Jongensfontein strand (“kak”)	2015-08-26	Pelargonium triste		corms	26		0		B	P, F
119	Plot16	Jongensfontein strand (“kak”)	2015-08-26	Pelargonium triste		corms	26		0		E	P, F
120	Plot16	Jongensfontein strand (“kak”)	2015-08-26	Pelargonium triste		corms	26		0		I	P, F
121	Plot13	Palmiet spot - just below N2 on the Gou Kou river	2015-11-12	Prionium serratum		meristem	20		20	on the edge, some small.	A	P, F
122	Plot13	Palmiet spot - just below N2 on the Gou Kou river	2015-11-12	Prionium serratum		meristem	20		20	on the edge, some small.	B	P, F
123	Plot13	Palmiet spot - just below N2 on the Gou Kou river	2016-10-19	Prionium serratum			0		0		H	P
124	Plot13	Palmiet spot - just below N2 on the Gou Kou river	2017-09-05	Prionium serratum		meristem	20				O	P
125	Plot07	Jongensfontein private nature reserve, closer to beach	2015-10-05	Satyrium carneum		tubers	1		1		B	F
126	Plot07	Jongensfontein private nature reserve, closer to beach	2016-09-03	Satyrium carneum			0		0		H	P
127	Plot07	Jongensfontein private nature reserve, closer to beach	2017-09-02	Satyrium carneum		tubers	23		23		A	P
128	Plot02	Windsor	2015-09-07	Satyrium longicolle		tubers	61		61	Forager: Die kleintjies (Satyriums) has got nothing on them.	A	P
129	Plot02	Windsor	2016-09-01	Satyrium longicolle		tubers	150		150		C	P
130	Plot02	Windsor	2017-09-02	Satyrium longicolle		tubers	200		200	Forager: Die kleintjies (Satyriums) has got nothing on them.	A	P
131	Plot02	Windsor	2017-09-02	Satyrium longicolle		tubers	200		200	Forager: Die kleintjies (Satyriums) has got nothing on them.	L	P
132	Plot20	Dave Bongers' farm	2015-09-03	Satyrium longicolle		tubers	4		4	Satyrium (big) spp left behind.	G	F
133		Dave Bongers' farm	2016-09-03	Satyrium longicolle		tubers	4		0	Satyrium (big) spp left behind.
134	Plot20	Dave Bongers' farm	2017-09-02	Satyrium longicolle			0		0	Leave nothing behind	H	P
135	Plot08	Gideon van Eeden, further from N2	2015-10-06	Tritonia crocata		corms	5		5	11 babiana ambigua, 1 tight lachenalia, 50 hairy catcher, > 250 plat klein blaar, 5 kalkoentjie, 4 oranje pypie, 1 but with spots, 60 hairy satyrium,	B	P, F
136	Plot08	Gideon van Eeden, further from N2	2015-10-06	Tritonia crocata		corms	5		5	11 babiana ambigua, 1 tight lachenalia, 50 hairy catcher, > 250 plat klein blaar, 5 kalkoentjie, 4 oranje pypie, 1 but with spots, 60 hairy satyrium,	B	P, F
137	Plot08	Gideon van Eeden, further from N2	2015-10-06	Tritonia crocata		corms	5		5	11 babiana ambigua, 1 tight lachenalia, 50 hairy catcher, > 250 plat klein blaar, 5 kalkoentjie, 4 oranje pypie, 1 but with spots, 60 hairy satyrium,	B	P, F
138	Plot08	Gideon van Eeden, further from N8	2016-08-30	Tritonia crocata		corms	45		45	45 Freezias, 3 P. lobatums, 7 Krismisblom, 1 Babiana	A	P
139	Plot08	Gideon van Eeden, further from N2	2017-09-04	Tritonia crocata			1		1		A	P
140	Plot09	Infinity farm	2015-10-06	Tritonia crocata		corms	17		17	One cyphia broke off so they left it behind. 17 kalkoentjies, 5 new ones, 1 cyphia (broke off left some behind) 10 big leaf satyrium.	A	P, F
141	Plot09	Infinity farm	2015-10-06	Tritonia crocata		corms	17		17	One cyphia broke off so they left it behind. 17 kalkoentjies, 5 new ones, 1 cyphia (broke off left some behind) 10 big leaf satyrium.	B	P, F
142	Plot09	Infinity farm	2015-10-06	Tritonia crocata		corms	17		17	One cyphia broke off so they left it behind. 17 kalkoentjies, 5 new ones, 1 cyphia (broke off left some behind) 10 big leaf satyrium.	C	P, F
143	Plot09	Infinity farm	2016-08-30	Tritonia crocata		corms	101		101	101 Freesia and 38 Satyriums.	C	F
144	Plot09	Infinity farm	2017-09-04	Tritonia crocata			12		12		A	P
145	Plot08	Gideon van Eeden	2016-08-30	Unknown sp 3	Krismisblom		8		8	45 Freezias, 3 P. lobatums, 7 Krismisblom, 1 Babiana	N	F
146	Plot14	Above tower, PB Reserve	2015-08-25	Wachendorfia speciflora			0		0		H	P
147	Plot10	Rein's Nature Reserve	2015-10-09	Watsonia fourcadii		corms	1		1	missed it. Under the canopy of a burnt Protea.	B	F
148	Plot10	Rein's Nature Reserve	2016-09-04	Watsonia fourcadii			0		0		H	P
149	Plot10	Rein's Nature Reserve	2017-08-31	Watsonia fourcadii		corms	0		0		H	P
150	Plot08	Gideon van Eeden, further from N2	2015-10-06	Watsonia sp		corms	5		0	11 babiana ambigua, 1 tight lachenalia, 50 hairy catcher, > 250 plat klein blaar, 5 kalkoentjie, 4 oranje pypie, 1 but with spots, 60 hairy satyrium,	H	P

## Sheet: 5.CodeMeaning
CODE	CODE	FREQUENCY
H	Plot is empty	55
B	Plant not seen	23
A	Plant too small	19
C	Foraging effort < return	11
E	Plant is inacessible	8
G	Foragers have enough food	8
N	Not a well-known edible	6
K	Plant part broke off	5
L	Soil too hard to extract plant	4
I	Dropped after extracted	2
D	Can not find the tuber	1
F	Can not reach the site	1
J	Vine of Cyphia breaks off	1
O
